# Supplementary material
Source: PubMed Central journal article supplement (PMC7878276)
Supplement: NIHMS1622853-supplement-1.pdf [file NIHMS1622853-supplement-1.pdf]

## The Roles of Physical Activity, Exercise, and Fitness in Promoting Resilience During Adolescence: Effects on Mental Well-being and Brain Development

### *Supplemental Information*

**Table S1. Physical activity or exercise and brain structure in children and adolescents**

| <b>A) Cross-sectional structural morphometric studies</b> |             |                 |                                                                    |                                      |                                                                                                                                            |                                                                                                                                                                                                                                                                                                                          |
|-----------------------------------------------------------|-------------|-----------------|--------------------------------------------------------------------|--------------------------------------|--------------------------------------------------------------------------------------------------------------------------------------------|--------------------------------------------------------------------------------------------------------------------------------------------------------------------------------------------------------------------------------------------------------------------------------------------------------------------------|
| <b>AUTHOR</b>                                             | <b>YEAR</b> | <b>DESIGN</b>   | <b>PARTICIPANTS</b>                                                | <b>PA or EX MEASURES</b>             | <b>BRAIN MEASURES</b>                                                                                                                      | <b>BRAIN STRUCTURE RESULTS</b>                                                                                                                                                                                                                                                                                           |
| Chaddock (1)                                              | 2010        | Cross-sectional | N=49, 9-10 year olds, <TS II, BMI NR, 59% Female, USA              | 21 HF and 28 LF based on VO2 testing | 3T MRI, structural ROIs of hippocampus and nucleus accumbens volumes                                                                       | HF > LF hippocampus volumes. No difference in nucleus accumbens volumes. Bilateral hippocampal volume positively correlated with accuracy on relational memory performance. Sobel test suggested greater hippocampal volume mediated the relationship between aerobic fitness and relational memory, but not item memory |
| Chaddock (2)                                              | 2010        | Cross-sectional | N=55, 9-10 year olds, <TS II, BMI NR, 55% Female, USA              | 25 HF and 30 LF based on VO2 testing | 3T MRI, structural ROIs of dorsal striatum (caudate nucleus and putamen), ventral striatum (nucleus accumbens) and globus pallidus volumes | HF > LF left caudate, bilateral putamen, bilateral globus pallidus. No difference in nucleus accumbens. Also see Chaddock 2012 for how these volumes relate to Flanker performance 1 year later in subsample                                                                                                             |
| Herting (3)                                               | 2012        | Cross-sectional | N=34, 15-18 year-olds, TS Mid-Post, 0% Female, Healthy Weight, USA | VO2 testing                          | 3T MRI, structural ROIs of hippocampal and whole brain volumes                                                                             | Aerobic fitness was positively associated with larger hippocampal volumes. No                                                                                                                                                                                                                                            |

|                     |      |                 |                                                                                      |                                                                                           |                                                                                                                                                                      |                                                                                                                                                                                                                                                                                                                                        |
|---------------------|------|-----------------|--------------------------------------------------------------------------------------|-------------------------------------------------------------------------------------------|----------------------------------------------------------------------------------------------------------------------------------------------------------------------|----------------------------------------------------------------------------------------------------------------------------------------------------------------------------------------------------------------------------------------------------------------------------------------------------------------------------------------|
|                     |      |                 |                                                                                      |                                                                                           |                                                                                                                                                                      | associations seen for global gray or white matter brain volumes                                                                                                                                                                                                                                                                        |
| Chaddock-Heyman (4) | 2015 | Cross-sectional | N=48, 9-10 year olds, <TS II, BMI NR, 54% Female, USA                                | 24 HF and 24 LF based on VO2 testing                                                      | 3T MRI, structural ROIs of frontal (anterior, middle, superior), parietal (superior, inferior), temporal (superior, middle, inferior), and lateral occipital volumes | HF < LF cortical thickness in the superior frontal, superior temporal, and lateral occipital                                                                                                                                                                                                                                           |
| Herting (5)         | 2016 | Cross-sectional | N=34, 15-18 year-olds, TS Mid-Post, 0% Female, Healthy Weight, USA                   | 17 HF and 17 LF based on VO2 testing                                                      | 3T MRI, structural whole brain cortical thickness, surface area, and volume                                                                                          | HF > LF right medial pericalcarine and cuneus and left precuneus surface areas. VO2 positively associated with left rostral middle frontal cortex volume. An interaction was seen between VO2 and BDNF genotype, with a positive association with VO2 bilateral lingual gyrus surface area in Val/Val carriers but not in Met carriers |
| Esteban-Cornejo (6) | 2017 | Cross-sectional | N=101, 8-11 year olds, Premenstrual for females, Overweight/Obese, 41% Female, Spain | ALPHA health-related fitness test battery (cardiorespiratory fitness by 20-m shuttle-run) | 3T MRI, structural whole brain gray matter tissue                                                                                                                    | Higher cardiorespiratory fitness was positively related to greater gray matter volumes in premotor and SMA, hippocampus, caudate, inferior temporal gyrus, parahippocampal gyrus, and calcarine cortex                                                                                                                                 |
| Esteban-Cornejo (7) | 2019 | Cross-sectional | N=101, 8-11 year olds, Premenstrual for females, Overweight/Obese, 41% Female, Spain | ALPHA health-related fitness test battery (cardiorespiratory fitness by 20-m shuttle-run) | 3T MRI, structural ROIs of right premotor cortex, right SMA and left IFG, left inferior                                                                              | Higher cardiorespiratory fitness was related to total greater cortical thickness, but not surface area or ROIs of cortical                                                                                                                                                                                                             |

|                     |      |                 |                                                                                                                                                                                                  |                                                                                                                                 |                                                                                                                                   |                                                                                                                                                                                                                                                                                                                                                                                                                                          |
|---------------------|------|-----------------|--------------------------------------------------------------------------------------------------------------------------------------------------------------------------------------------------|---------------------------------------------------------------------------------------------------------------------------------|-----------------------------------------------------------------------------------------------------------------------------------|------------------------------------------------------------------------------------------------------------------------------------------------------------------------------------------------------------------------------------------------------------------------------------------------------------------------------------------------------------------------------------------------------------------------------------------|
|                     |      |                 |                                                                                                                                                                                                  | fitness by 20-m shuttle-run)                                                                                                    | temporal gyrus, right parahippocampal gyrus and right superior temporal gyrus, and occipital/calcarine thickness and surface area | thickness. This association was also mediated by fat mass index                                                                                                                                                                                                                                                                                                                                                                          |
| Esteban-Cornejo (8) | 2019 | Cross-sectional | 2 samples:<br>ActiveBrains: N=100, 8-11 year olds, Premenstrual for females, Overweight/obese, 40% Female Spain; FITKids2: N = 142, 7-9 year olds, <TS II, 36% Overweight/Obese, 55% Female, USA | ActiveBrains: ALPHA health-related fitness test battery (cardiorespiratory fitness by 20-m shuttle-run); FIT Kids2: VO2 testing | 3T MRI, structural whole brain white matter volume                                                                                | ActiveBrains: Higher cardiorespiratory fitness was positively related to white matter volume in the inferior fronto-opercular gyrus and inferior temporal gyrus. Overweight/Obese FIT Kids2: cardiorespiratory fitness was positively related to inferior temporal gyrus, cingulate gyrus, middle occipital gyrus, and fusiform gyrus. Normal Weight FIT Kids2: No association between cardiorespiratory fitness and white matter volume |
| Gorham (9)          | 2019 | Cross-sectional | N=4191, 9-11 year olds, TS NR, BMI NR, 48% Female, USA                                                                                                                                           | Caregiver-report on the Sports and Activities Involvement Questionnaire for 23 sports                                           | 3T MRI, structural ROIs of hippocampus volumes                                                                                    | Team and structured sports involvement was associated correlated with hippocampal volume in both boys and girls. Hippocampal volume also interacted with sex to predict depressive symptoms, with a negative relationship in boys, and served as a partial mediator for the relationship between involvement in sports and depressive symptoms in boys                                                                                   |
| Ruotsalainen (10)   | 2019 | Cross-sectional | N=60, 12-16 years old, TS Range: 1.5-                                                                                                                                                            | Hip accelerometers                                                                                                              | 3T MRI, structural subcortical ROIs:                                                                                              | Cardiorespiratory fitness was negatively related to the left                                                                                                                                                                                                                                                                                                                                                                             |

|                                                                                                                                                  |  |  |                                                     |                                              |                                                                                                                                                                                                                                                                                                                                                                                   |                                                                                                                |
|--------------------------------------------------------------------------------------------------------------------------------------------------|--|--|-----------------------------------------------------|----------------------------------------------|-----------------------------------------------------------------------------------------------------------------------------------------------------------------------------------------------------------------------------------------------------------------------------------------------------------------------------------------------------------------------------------|----------------------------------------------------------------------------------------------------------------|
|                                                                                                                                                  |  |  | 5.0, BMI Range<br>15.7–31.1, 67%<br>Female, Finland | MVPA and<br>maximal 20-m<br>shuttle run test | putamen, pallidum,<br>caudate, nucleus<br>accumbens,<br>thalamus<br>and hippocampus<br>volumes. Cortical<br>ROIs: paracentral<br>lobule, postcentral<br>gyrus,<br>posterior cingulate<br>cortex, precentral<br>gyrus, superior<br>frontal gyrus,<br>lateral orbitofrontal<br>cortex, anterior<br>cingulate cortex,<br>middle frontal gyrus,<br>and medial<br>orbitofrontal cortex | superior frontal cortex volume<br>and positively related to the left<br>pallidum. No associations with<br>MVPA |
| STUDY DESIGN is based on MRI portion of the study. Abbreviations: HF=high-fit; LF=low-fit; TS=Tanner Stage; BMI=Body Mass Index; NR=not reported |  |  |                                                     |                                              |                                                                                                                                                                                                                                                                                                                                                                                   |                                                                                                                |

**Table S2. Physical activity or exercise and white matter microstructure in children and adolescents**

| <b>A) Cross-sectional DTI Studies</b> |             |                 |                                                                                 |                                                                                      |                                                                                                        |                                                                                                                                                                                                                                                                                                                                                              |
|---------------------------------------|-------------|-----------------|---------------------------------------------------------------------------------|--------------------------------------------------------------------------------------|--------------------------------------------------------------------------------------------------------|--------------------------------------------------------------------------------------------------------------------------------------------------------------------------------------------------------------------------------------------------------------------------------------------------------------------------------------------------------------|
| <b>AUTHOR</b>                         | <b>YEAR</b> | <b>DESIGN</b>   | <b>PARTICIPANTS</b>                                                             | <b>PA or EX MEASURES</b>                                                             | <b>BRAIN MEASURES</b>                                                                                  | <b>BRAIN STRUCTURE RESULTS</b>                                                                                                                                                                                                                                                                                                                               |
| Chaddock-Heyman (11)                  | 2014        | Cross-sectional | N=24, 9-10 year olds, <TS II, BMI NR, 38% Female, USA                           | 12 HF and 12 LF based on VO2 testing                                                 | 3T MRI, diffusion tensor imaging (4 b0, 30-directions at b=1000 s/mm2) & TBSS and tracts ROIs from JHU | HF > LF FA in corpus callosum, superior corona radiata (SCR), and superior longitudinal fasciculus (SLF)                                                                                                                                                                                                                                                     |
| Herting (12)                          | 2014        | Cross-sectional | N=34, 15-18 year-olds, TS Mid-Post, 0% Female, Healthy Weight, USA              | 17 HF and 17 LF based on VO2 testing                                                 | 3T MRI, diffusion tensor imaging (6 b0, 30-directions at b=1000 s/mm2) & TBSS and tractography         | HF > LF streamline number in tracts of bilateral corticospinal tract (CST) and genu of the corpus callosum (CC). VO2 was negatively associated with FA in portions of the left CST in all subjects                                                                                                                                                           |
| Rodriguez-Ayllon (13)                 | 2019        | Cross-sectional | N=103, 8-11 year olds, TS NR, Overweight/Obese, 41% Female, Spain               | Hip and wrist accelerometers for 7 days; self-report on Youth Activity Profile-Spain | 3T MRI, diffusion tensor imaging (1 b0, 30-directions at b=1000 s/mm2) & tractography                  | Self-reported total physical activity as well as objective measurements of total, light, and MVPA were positively correlated with total whole brain FA. Objectively measured total activity was negatively correlated with whole brain RD. No associations with either self-reported or objective measurements of physical activity were found with MD or AD |
| Rodriguez-Ayllon (14)                 | 2020        | Cross-sectional | N=2532, 10 year olds, TS NR, BMI Mean 17.36+/-2.50, 50% Female, The Netherlands | Caregiver-report about the number of days per week and duration per day their child  | 3T MRI, diffusion tensor imaging (b0 NR, 30-directions at b=1000 s/mm2) & tractography                 | Total physical activity was positively associated with global FA and negatively with MD. Follow-up analyses showed this association was seen when                                                                                                                                                                                                            |

|                           |             |                 |                                                                                    |                                                                                           |                                                                                                                                                                                                                                                                                     |                                                                                                                                                                                                                                                              |
|---------------------------|-------------|-----------------|------------------------------------------------------------------------------------|-------------------------------------------------------------------------------------------|-------------------------------------------------------------------------------------------------------------------------------------------------------------------------------------------------------------------------------------------------------------------------------------|--------------------------------------------------------------------------------------------------------------------------------------------------------------------------------------------------------------------------------------------------------------|
|                           |             |                 |                                                                                    | engages in: (i) walking or cycling to/from school, (ii) outdoor play, and (iii) sports    |                                                                                                                                                                                                                                                                                     | looking at outdoor play or sports participation. No association was found between total physical activity and FA within individual tracts. Negative associations seen between total physical activity and MD in almost all individual tracts                 |
| Ruotsalainen (15)         | 2020        | Cross-sectional | N=59, 12-16 years old, TS Range: 1.5-5.0, BMI Range 14.6–31.1, 66% Female, Finland | Hip accelerometers for 7 days and maximal 20-m shuttle run test                           | 3T MRI, diffusion tensor imaging (10 b0, 30-directions at b=1000 s/mm2) & TBSS with ROIs of the body and genu of corpus callosum (CC), the bilateral superior corona radiata (SCR), the bilateral superior longitudinal fasciculus (SLF) and the bilateral uncinate fasciculus (UF) | Cardiorespiratory fitness was positively related to FA and negatively related to MD, AD, and RD in the SCR and the CC. No associations with MVPA. FA in the CC and right SCR moderated the relationship between cardiorespiratory fitness and working memory |
| <b>B) RCT DTI Studies</b> |             |                 |                                                                                    |                                                                                           |                                                                                                                                                                                                                                                                                     |                                                                                                                                                                                                                                                              |
| <b>AUTHOR</b>             | <b>YEAR</b> | <b>DESIGN</b>   | <b>PARTICIPANTS</b>                                                                | <b>PA or EX MEASURES</b>                                                                  | <b>BRAIN MEASURES</b>                                                                                                                                                                                                                                                               | <b>BRAIN STRUCTURE RESULTS</b>                                                                                                                                                                                                                               |
| Krafft (16)               | 2014        | RCT             | N=18, 8-11 year olds, TS NR, Sedentary/Overweight, 50% Female, USA                 | Both groups were offered an after school program every school day for ~8 months. EX group | 3T MRI, diffusion tensor imaging (3 b0, 30-directions at b=1000 s/mm2) & tractography of the superior                                                                                                                                                                               | No significant group by time interaction seen, but a time by group by attendance interaction. EX group showed an effect with attendance and change in the right SLF (FA/RD) and a trend for the left SLF FA. The control                                     |

|                |      |     |                                                                    |                                                                                                                                                                                                                                                                                                |                                                                                                                                   |                                                                                                                                                                                                                                                                                                                                                                                                                                |
|----------------|------|-----|--------------------------------------------------------------------|------------------------------------------------------------------------------------------------------------------------------------------------------------------------------------------------------------------------------------------------------------------------------------------------|-----------------------------------------------------------------------------------------------------------------------------------|--------------------------------------------------------------------------------------------------------------------------------------------------------------------------------------------------------------------------------------------------------------------------------------------------------------------------------------------------------------------------------------------------------------------------------|
|                |      |     |                                                                    | participated in 40 min of instructor-led aerobic activities (e.g., tag or jump rope) (N=10). CON group participated in instructors led sedentary activities (e.g., art and board games) daily (N=8).                                                                                           | longitudinal fasciculus (SLF)                                                                                                     | group did not show significant relationships between attendance and change in SLF                                                                                                                                                                                                                                                                                                                                              |
| Schaeffer (17) | 2014 | RCT | N=18, 8-11 year olds, TS NR, Sedentary/Overweight, %Female NR, USA | Both groups were offered an after school program every school day for ~8 months. EX group participated in 40 min of instructor-led aerobic activities (e.g., tag or jump rope) (N=10). CON group participated in instructors led sedentary activities (e.g., art and board games) daily (N=8). | 3T MRI, diffusion tensor imaging (3 b0, 30-directions at b=1000 s/mm <sup>2</sup> ) & tractography of the uncinat fasciculus (UF) | Groups did not differ at baseline. From baseline to posttest, EX group showed greater positive change in bilateral FA of the UF when compared to the control group. EX also showed greater negative change in RD of the left UF. No significant correlations were found between changes in measures of white matter integrity (FA and RD) and measures of fitness or fitness (BMI, percent body fat, and VO <sub>2</sub> peak) |

|                                                                                                                                                                                                                                                                                   |      |     |                                                                                                              |                                                                                                                                                                        |                                                                                                                     |                                                                                                                                                                           |
|-----------------------------------------------------------------------------------------------------------------------------------------------------------------------------------------------------------------------------------------------------------------------------------|------|-----|--------------------------------------------------------------------------------------------------------------|------------------------------------------------------------------------------------------------------------------------------------------------------------------------|---------------------------------------------------------------------------------------------------------------------|---------------------------------------------------------------------------------------------------------------------------------------------------------------------------|
| Chaddock-Heyman (18)                                                                                                                                                                                                                                                              | 2018 | RCT | N=143, 7-9 year olds, <TS II, pre-test BMI average of 19.0 and 18.7 for the EX and control group, 51% Female | 9-month, 2-hr after school EX program (FIT Kids, N=76) or waitlist CON group (N=67). EX group spent 30–35 min of sustained MVPA and up to 90 min of intermittent MVPA. | 3T MRI, diffusion tensor imaging (2 b0, 30-directions at b=1000 s/mm <sup>2</sup> ) & TBSS and tracts ROIs from JHU | EX group had increased FA, decreased RD, and no change in AD in the genu of the corpus callosum (CC) from pre- to posttest. No changes seen in the waitlist control group |
| STUDY DESIGN is based on MRI portion of the study. Abbreviations: HF=high-fit; LF=low-fit; TS=Tanner Stage; BMI=Body Mass Index; NR=not reported; FA=fractional anisotropy; MD=mean diffusivity; RD=radial diffusivity; AD=axial diffusivity; TBSS=tract based spatial statistics |      |     |                                                                                                              |                                                                                                                                                                        |                                                                                                                     |                                                                                                                                                                           |



**Table S3. Physical activity or exercise and brain activity, intrinsic resting-state, and cerebral blood flow in children and adolescents**

| <b>A) Cross-sectional fMRI tasks studies</b> |             |                 |                                                                    |                                  |                                               |                                                                                                                                                                                                                                                                                                                                                              |
|----------------------------------------------|-------------|-----------------|--------------------------------------------------------------------|----------------------------------|-----------------------------------------------|--------------------------------------------------------------------------------------------------------------------------------------------------------------------------------------------------------------------------------------------------------------------------------------------------------------------------------------------------------------|
| <b>AUTHOR</b>                                | <b>YEAR</b> | <b>DESIGN</b>   | <b>PARTICIPANTS</b>                                                | <b>PA or EX MEASURES</b>         | <b>BRAIN MEASURES</b>                         | <b>BRAIN FUNCTION RESULTS</b>                                                                                                                                                                                                                                                                                                                                |
| Voss (19)                                    | 2011        | Cross-sectional | N=36, 9-10 years-old, <TS II, BMI NR, 53% Female, USA              | 18 HF and 18 LF based on VO2 Max | 3T MRI; Flanker fMRI                          | Incongruent > Congruent (Inhibition contrast). LF>HF: greater activation of brain regions associated with attentional control and inhibition including precentral and postcentral gyrus, insular/operculum, middle frontal gyrus (MFG)                                                                                                                       |
| Chaddock (20)                                | 2012        | Cross-sectional | N=32, 9-10 year olds, <TS II, BMI NR, 50% Female, USA              | 14 HF and 18 LF based on VO2 Max | 3T MRI; Flanker task, fMRI                    | Congruent or Incongruent Contrasts, Incongruent > Congruent NR. During Incongruent Trials, HF > LF: greater activation of bilateral middle frontal gyrus (MFG), anterior cingulate (ACC), supplementary motor area (SMA), left superior parietal lobe (SPL) during the first half, but no difference between groups at the end of the latter end of the task |
| Herting (21)                                 | 2013        | Cross-sectional | N=34, 15-18 year-olds, TS Mid-Post, 0% Female, Healthy Weight, USA | 17 HF and 17 LF based on VO2 Max | 3T MRI; Verbal Associative Learning task fMRI | High Confidence Remembered vs. Forgotten Contrasts. Group differences were seen in brain activity despite absence of performance differences. LF > HF: less activation in superior frontal gyrus (SFG), but greater activation in bilateral hippocampus. HF > LF:                                                                                            |

|                                 |             |               |                                                                                                                  |                                                                                                                                                                                                                               |                                                                                                                                | deactivation in posterior cingulate (PCC). HF youth showed a strong negative coupling in BOLD response between the hippocampus and default mode network (DMN) brain regions during successful memory encoding (vs. baseline), whereas LF youth showed positive coupling |
|---------------------------------|-------------|---------------|------------------------------------------------------------------------------------------------------------------|-------------------------------------------------------------------------------------------------------------------------------------------------------------------------------------------------------------------------------|--------------------------------------------------------------------------------------------------------------------------------|-------------------------------------------------------------------------------------------------------------------------------------------------------------------------------------------------------------------------------------------------------------------------|
| <b>B) RCT fMRI task studies</b> |             |               |                                                                                                                  |                                                                                                                                                                                                                               |                                                                                                                                |                                                                                                                                                                                                                                                                         |
| <b>AUTHOR</b>                   | <b>YEAR</b> | <b>DESIGN</b> | <b>PARTICIPANTS</b>                                                                                              | <b>PA or EX MEASURES</b>                                                                                                                                                                                                      | <b>BRAIN MEASURES</b>                                                                                                          | <b>BRAIN FUNCTION RESULTS</b>                                                                                                                                                                                                                                           |
| Davis (22)                      | 2011        | RCT           | N=20, 7-11 year olds, TS NR, 40% Female, Sedentary/Overweight, USA                                               | Groups included 13 ± 1.6 weeks of an EX program (N=11) or CON group (N=9). EX group participated in either a low or high dose (20 vs. 40 min.) of instructor-led aerobic activities (N=13). No program provided to CON group. | 3T MRI; Anti-saccade task fMRI                                                                                                 | Exact contrast NR, Increased bilateral prefrontal cortex (PFC) activity and reduced posterior parietal cortex activity during antisaccade task                                                                                                                          |
| Chaddock-Heyman (23)            | 2013        | RCT           | N=23, 8-9 year olds, TS <II, pre-test BMI average of 18.4 and 19.3 for the EX and control group, 57% Female, USA | 9-month, 2-hr after school EX program (FIT Kids, N=14) or waitlist CON group (N=9). EX group received                                                                                                                         | 3T MRI; modified Flanker task with no-go trials, fMRI. Regions of interest included right anterior prefrontal cortex (PFC) and | Mean percent signal change (versus fixation) was extracted for incongruent, neutral, and NoGo conditions. Incongruent > Congruent NR. PA > Control decreases in brain activity in right anterior PFC from pre-test                                                      |

|             |      |     |                                                                     |                                                                                                                                                                                                                                                                                                 |                                     |                                                                                                                                                                                                                                                                                                                                                                                                                                                                                                                                                                                                                                                                                                                                                           |
|-------------|------|-----|---------------------------------------------------------------------|-------------------------------------------------------------------------------------------------------------------------------------------------------------------------------------------------------------------------------------------------------------------------------------------------|-------------------------------------|-----------------------------------------------------------------------------------------------------------------------------------------------------------------------------------------------------------------------------------------------------------------------------------------------------------------------------------------------------------------------------------------------------------------------------------------------------------------------------------------------------------------------------------------------------------------------------------------------------------------------------------------------------------------------------------------------------------------------------------------------------------|
|             |      |     |                                                                     | at least 70-minutes of MVPA. No program provided to CON group.                                                                                                                                                                                                                                  | the anterior cingulate cortex (ACC) | to post-test for incongruent, where as the activation patterns in this frontal region in the wait-list control group remained unchanged. No differences in ACC between groups for incongruent trials. PA > Control also showed shorter reaction time for both incongruent trials and neutral trials at post-test relative to pre-test                                                                                                                                                                                                                                                                                                                                                                                                                     |
| Krafft (24) | 2014 | RCT | N=43, 8-11 year olds, TS NR, 65% Females, Sedentary/Overweight, USA | Both groups were offered an after school program every school day for ~8 months. EX group participated in 40 min of instructor-led aerobic activities (e.g., tag or jump rope) (N=24). CON group participated in instructors led sedentary activities (e.g., art and board games) daily (N=19). | 3T MRI; Anti-saccade & Flanker fMRI | Both groups showed improved task performance on antisaccade and flanker tasks. Group differences in brain changes were seen even in the absence of performance differences. Antisaccade vs. fixation contrast: From baseline to post-test, the exercise group decreased activation in bilateral precentral gyrus, medial frontal gyrus (MFG), paracentral lobule, postcentral gyrus, superior parietal lobule (SPL), inferior parietal lobule (IPL), and anterior cingulate cortex (ACC); right inferior frontal gyrus (IFG) and insula; and left precuneus. In all of these regions, the exercise group showed a pattern of decreasing activation over time, while the control group showed the opposite pattern (i.e. increasing activation over time). |

|                              |             |               |                                                                    |                                                                                                                                                                                                                                                                            |                                                                                                                                               | Incongruent vs. congruent Flanker contrast: bilateral superior frontal gyrus (SFG), medial frontal gyrus (MFG), cingulate gyrus, and anterior cingulate cortex (ACC); and left inferior frontal gyrus (IFG) and insula. In all regions in this contrast, the exercise group showed increased activation over time, while the control group showed decreased activation                                                                                                 |
|------------------------------|-------------|---------------|--------------------------------------------------------------------|----------------------------------------------------------------------------------------------------------------------------------------------------------------------------------------------------------------------------------------------------------------------------|-----------------------------------------------------------------------------------------------------------------------------------------------|------------------------------------------------------------------------------------------------------------------------------------------------------------------------------------------------------------------------------------------------------------------------------------------------------------------------------------------------------------------------------------------------------------------------------------------------------------------------|
| <b>C) Resting-State fMRI</b> |             |               |                                                                    |                                                                                                                                                                                                                                                                            |                                                                                                                                               |                                                                                                                                                                                                                                                                                                                                                                                                                                                                        |
| <b>AUTHOR</b>                | <b>YEAR</b> | <b>DESIGN</b> | <b>PARTICIPANTS</b>                                                | <b>PA or EX MEASURES</b>                                                                                                                                                                                                                                                   | <b>BRAIN MEASURES</b>                                                                                                                         | <b>BRAIN FUNCTION RESULTS</b>                                                                                                                                                                                                                                                                                                                                                                                                                                          |
| Krafft (25)                  | 2014        | RCT           | N=22, 8-11 year olds, TS NR, Sedentary/Overweight, 67% Female, USA | Both groups were offered an after school program every school day for ~8 months. EX group participated in 40 min of instructor-led aerobic activities (e.g., tag or jump rope) (N=13). CON group participated in instructors led sedentary activities (e.g., art and board | 3T MRI; resting state eyes-closed fMRI; Independent component analysis (ICA) to look at default, salience, cognitive control#, motor networks | Less resting-state correlations in EX vs. Control group between the default mode network (DMN) and the occipital, cuneus, superior temporal, and posterior cingulate (PCC); Less resting-state correlations in EX vs. Control group between the cognitive control network with and cerebellum, posterior cingulate (PCC), precuneus and less motor network connectivity with the cuneus but more connectivity between the motor network and medial frontal gyrus (MFG) |

|                                                                                                                                                                                                                                         |             |                 |                                                      | games) daily (N=9).      |                                                                                                      |                                                                                                                                                                                                                          |
|-----------------------------------------------------------------------------------------------------------------------------------------------------------------------------------------------------------------------------------------|-------------|-----------------|------------------------------------------------------|--------------------------|------------------------------------------------------------------------------------------------------|--------------------------------------------------------------------------------------------------------------------------------------------------------------------------------------------------------------------------|
| <b>D) Cerebral Blood Flow</b>                                                                                                                                                                                                           |             |                 |                                                      |                          |                                                                                                      |                                                                                                                                                                                                                          |
| <b>AUTHOR</b>                                                                                                                                                                                                                           | <b>YEAR</b> | <b>DESIGN</b>   | <b>PARTICIPANTS</b>                                  | <b>PA or EX MEASURES</b> | <b>BRAIN MEASURES</b>                                                                                | <b>BRAIN FUNCTION RESULTS</b>                                                                                                                                                                                            |
| Chaddock-Heyman (26)                                                                                                                                                                                                                    | 2016        | Cross-sectional | N=73, 7-9 year olds, TS <II, BMI NR, 56% Female, USA | VO2 Max                  | 3T MRI, pseudo-continuous Arterial Spin Labeling (pcASL). Regions included hippocampus and brainstem | Higher aerobic fitness predicted greater cerebral blood flow (CBF) in the hippocampus when controlling for age, sex, and average hippocampal volume but no association seen between aerobic fitness and CBF in brainstem |
| <p>STUDY DESIGN is based on MRI portion of the study. Abbreviations: HF=high-fit; LF=low-fit; TS=Tanner Stage; BMI=Body Mass Index; NR=not reported</p> <p># Overlaps with frontoparietal network defined in the current manuscript</p> |             |                 |                                                      |                          |                                                                                                      |                                                                                                                                                                                                                          |

Box 1: Key remaining questions regarding physical activity, exercise, and neurobiological mechanisms of resilience for mental health in adolescence.

1. Are there critical windows where exercise may confer larger and/or more long-term benefits than others (i.e. childhood and adolescence vs. adulthood)? Are these effects different by sex or pubertal stage?
2. Are PA and exercise effects specific to the proposed large-scale functional connectivity networks involving the PFC (i.e. frontoparietal, default mode, and corticolimbic systems)? How do potential changes in these networks contribute to mental health resilience?
3. How do various types, intensities, and frequencies of PA and exercise (i.e. aerobic vs. resistance training; high-intensity vs. low-intensity, cognitively demanding vs. mindfulness regimens) influence brain structure, function, and their associated cognitive control processes related to both internalizing and externalizing symptoms and risk for mental health disorders in adolescence?

### Supplemental References

1. Chaddock L, Erickson KI, Prakash RS, Kim JS, Voss MW, Vanpatter M, et al. (2010): A neuroimaging investigation of the association between aerobic fitness, hippocampal volume, and memory performance in preadolescent children. *Brain Res.* 1358:172-183.
2. Chaddock L, Erickson KI, Prakash RS, VanPatter M, Voss MW, Pontifex MB, et al. (2010): Basal ganglia volume is associated with aerobic fitness in preadolescent children. *Dev Neurosci.* 32:249-256.
3. Herting MM, Nagel BJ (2012): Aerobic fitness relates to learning on a virtual Morris Water Task and hippocampal volume in adolescents. *Behav Brain Res.* 233:517-525.
4. Chaddock-Heyman L, Erickson KI, Kienzler C, King M, Pontifex MB, Raine LB, et al. (2015): The Role of Aerobic Fitness in Cortical Thickness and Mathematics Achievement in Preadolescent Children. *Plos One.* 10.
5. Herting MM, Keenan MF, Nagel BJ (2016): Aerobic Fitness Linked to Cortical Brain Development in Adolescent Males: Preliminary Findings Suggest a Possible Role of BDNF Genotype. *Front Hum Neurosci.* 10:327.
6. Esteban-Cornejo I, Cadenas-Sanchez C, Contreras-Rodriguez O, Verdejo-Roman J, Mora-Gonzalez J, Migueles JH, et al. (2017): A whole brain volumetric approach in overweight/obese children: Examining the association with different physical fitness components and academic performance. The ActiveBrains project. *NeuroImage.* 159:346-354.
7. Esteban-Cornejo I, Mora-Gonzalez J, Cadenas-Sanchez C, Contreras-Rodriguez O, Verdejo-Roman J, Henriksson P, et al. (2019): Fitness, cortical thickness and surface area in overweight/obese children: The mediating role of body composition and relationship with intelligence. *NeuroImage.* 186:771-781.
8. Esteban-Cornejo I, Rodriguez-Ayllon M, Verdejo-Roman J, Cadenas-Sanchez C, Mora-Gonzalez J, Chaddock-Heyman L, et al. (2019): Physical Fitness, White Matter Volume and Academic Performance in Children: Findings From the ActiveBrains and FITKids2 Projects. *Front Psychol.* 10.
9. Gorham LS, Jernigan T, Hudziak J, Barch DM (2019): Involvement in Sports, Hippocampal Volume, and Depressive Symptoms in Children. *Biol Psychiat-Cogn N.* 4:484-492.
10. Ruotsalainen I, Renvall V, Gorbach T, Syvaaja HJ, Tammelin TH, Karvanen J, et al. (2019): Aerobic fitness, but not physical activity, is associated with grey matter volume in adolescents. *Behav Brain Res.* 362:122-130.

11. Chaddock-Heyman L, Erickson KI, Holtrop JL, Voss MW, Pontifex MB, Raine LB, et al. (2014): Aerobic fitness is associated with greater white matter integrity in children. *Frontiers in Human Neuroscience*. 8.
12. Herting MM, Colby JB, Sowell ER, Nagel BJ (2014): White matter connectivity and aerobic fitness in male adolescents. *Dev Cogn Neurosci*. 7:65-75.
13. Rodriguez-Ayllon M, Esteban-Cornejo I, Verdejo-Roman J, Muetzel RL, Migueles JH, Mora-Gonzalez J, et al. (2019): Physical Activity, Sedentary Behavior, and White Matter Microstructure in Children with Overweight or Obesity. *Medicine and science in sports and exercise*.
14. Rodriguez-Ayllon M, Derks IPM, van den Dries MA, Esteban-Cornejo I, Labrecque JA, Yang-Huang JW, et al. (2020): Associations of physical activity and screen time with white matter microstructure in children from the general population. *NeuroImage*. 205.
15. Ruotsalainen I, Gorbach T, Perkola J, Renvall V, Syvaaja HJ, Tammelin TH, et al. (2020): Physical activity, aerobic fitness, and brain white matter: Their role for executive functions in adolescence. *Dev Cogn Neurosci*. 42:100765.
16. Krafft CE, Schaeffer DJ, Schwarz NF, Chi LX, Weinberger AL, Pierce JE, et al. (2014): Improved Frontoparietal White Matter Integrity in Overweight Children Is Associated with Attendance at an After-School Exercise Program. *Dev Neurosci-Basel*. 36:1-9.
17. Schaeffer DJ, Krafft CE, Schwarz NF, Chi LX, Rodrigue AL, Pierce JE, et al. (2014): An 8-month exercise intervention alters frontotemporal white matter integrity in overweight children. *Psychophysiology*. 51:728-733.
18. Chaddock-Heyman L, Erickson KI, Kienzler C, Drollette ES, Raine LB, Kao SC, et al. (2018): Physical Activity Increases White Matter Microstructure in Children. *Front Neurosci-Switz*. 12.
19. Voss MW, Chaddock L, Kim JS, VanPatter M, Pontifex MB, Raine LB, et al. (2011): Aerobic fitness is associated with greater efficiency of the network underlying cognitive control in preadolescent children. *Neuroscience*. 199:166-176.
20. Chaddock L, Erickson KI, Prakash RS, Voss MW, VanPatter M, Pontifex MB, et al. (2012): A functional MRI investigation of the association between childhood aerobic fitness and neurocognitive control. *Biological psychology*. 89:260-268.
21. Herting MM, Nagel BJ (2013): Differences in brain activity during a verbal associative memory encoding task in high-and low-fit adolescents. *Journal of cognitive neuroscience*. 25:595-612.



22. Davis CL, Tomporowski PD, McDowell JE, Austin BP, Miller PH, Yanasak NE, et al. (2011): Exercise improves executive function and achievement and alters brain activation in overweight children: a randomized, controlled trial. *Health Psychol.* 30:91-98.
23. Chaddock-Heyman L, Erickson KI, Voss MW, Knecht AM, Pontifex MB, Castelli DM, et al. (2013): The effects of physical activity on functional MRI activation associated with cognitive control in children: a randomized controlled intervention. *Front Hum Neurosci.* 7:72.
24. Krafft CE, Schwarz NF, Chi L, Weinberger AL, Schaeffer DJ, Pierce JE, et al. (2014): An 8-month randomized controlled exercise trial alters brain activation during cognitive tasks in overweight children. *Obesity (Silver Spring).* 22:232-242.
25. Krafft CE, Pierce JE, Schwarz NF, Chi L, Weinberger AL, Schaeffer DJ, et al. (2014): An eight month randomized controlled exercise intervention alters resting state synchrony in overweight children. *Neuroscience.* 256:445-455.
26. Chaddock-Heyman L, Erickson KI, Chappell MA, Johnson CL, Kienzler C, Knecht A, et al. (2016): Aerobic fitness is associated with greater hippocampal cerebral blood flow in children. *Dev Cogn Neuros-Neth.* 20:52-58.
